# Supplementary material
Source: publisher site journal article supplement (https://www.spandidos-publications.com/2427/downloadSupplementary)
Supplement: Supplementary file 1 [file downloadSupplementary]

## Sheet: GO
Table SVII. GO Analysis of Proteins between GEO-BPA and control group.
Term Type	GO Term	GO ID	GEO-BPA num	GEO-BPA percent
cellular_component	cell part	GO:0044464	183	183/192
cellular_component	cell	GO:0005623	183	183/192
biological_process	cellular process	GO:0009987	177	177/192
cellular_component	organelle	GO:0043226	176	176/192
molecular_function	binding	GO:0005488	176	176/192
biological_process	single-organism process	GO:0044699	162	162/192
biological_process	metabolic process	GO:0008152	151	151/192
cellular_component	organelle part	GO:0044422	151	151/192
biological_process	biological regulation	GO:0065007	126	126/192
cellular_component	membrane	GO:0016020	124	124/192
biological_process	regulation of biological process	GO:0050789	116	116/192
biological_process	cellular component organization or biogenesis	GO:0071840	113	113/192
cellular_component	macromolecular complex	GO:0032991	112	112/192
biological_process	response to stimulus	GO:0050896	106	106/192
molecular_function	catalytic activity	GO:0003824	102	102/192
cellular_component	membrane-enclosed lumen	GO:0031974	101	101/192
biological_process	localization	GO:0051179	96	96/192
cellular_component	membrane part	GO:0044425	95	95/192
biological_process	multicellular organismal process	GO:0032501	84	84/192
biological_process	developmental process	GO:0032502	78	78/192
biological_process	negative regulation of biological process	GO:0048519	77	77/192
cellular_component	extracellular region	GO:0005576	75	75/192
biological_process	signaling	GO:0023052	73	73/192
biological_process	positive regulation of biological process	GO:0048518	73	73/192
cellular_component	extracellular region part	GO:0044421	73	73/192
biological_process	immune system process	GO:0002376	43	43/192
biological_process	multi-organism process	GO:0051704	34	34/192
molecular_function	molecular function regulator	GO:0098772	32	32/192
molecular_function	transporter activity	GO:0005215	27	27/192
biological_process	locomotion	GO:0040011	24	24/192
cellular_component	cell junction	GO:0030054	21	21/192
biological_process	biological adhesion	GO:0022610	18	18/192
biological_process	reproduction	GO:0000003	18	18/192
biological_process	reproductive process	GO:0022414	18	18/192
cellular_component	supramolecular complex	GO:0099080	18	18/192
molecular_function	structural molecule activity	GO:0005198	17	17/192
molecular_function	signal transducer activity	GO:0004871	15	15/192
biological_process	growth	GO:0040007	14	14/192
molecular_function	molecular transducer activity	GO:0060089	13	13/192
cellular_component	synapse part	GO:0044456	12	12/192
cellular_component	synapse	GO:0045202	12	12/192
molecular_function	nucleic acid binding transcription factor activity	GO:0001071	11	11/192
biological_process	behavior	GO:0007610	10	10/192
molecular_function	transcription factor activity, protein binding	GO:0000988	8	8/192
molecular_function	antioxidant activity	GO:0016209	6	6/192
biological_process	rhythmic process	GO:0048511	5	5/192
molecular_function	electron carrier activity	GO:0009055	5	5/192
biological_process	detoxification	GO:0098754	4	4/192
cellular_component	virion	GO:0019012	4	4/192
cellular_component	other organism	GO:0044215	4	4/192
cellular_component	virion part	GO:0044423	4	4/192
cellular_component	other organism part	GO:0044217	4	4/192
biological_process	cell killing	GO:0001906	3	3/192
cellular_component	nucleoid	GO:0009295	3	3/192
biological_process	presynaptic process involved in chemical synaptic transmission	GO:0099531	2	2/192
molecular_function	translation regulator activity	GO:0045182	1	1/192
molecular_function	chemoattractant activity	GO:0042056	1	1/192
